# Supplementary material for: Genetic characteristics of Bursaphelenchus xylophilus third-stage dispersal juveniles
Source: PubMed Central journal article supplement (PMC7887269; doi:10.1038/s41598-021-82343-9), 2021-02-16
Supplement: 41598_2021_82343_MOESM1_ESM.pdf [file 41598_2021_82343_MOESM1_ESM.pdf]

# **Genetic characteristics of *Bursaphelenchus xylophilus* third-stage dispersal juveniles**

Qiaoli Chen<sup>1,2§</sup>, Ruizhi Zhang<sup>1§</sup>, Danlei Li<sup>1,2</sup>, Feng Wang<sup>1,2\*</sup>

<sup>1</sup>Key Laboratory of Alien Forest Pests Detection and Control-Heilongjiang Province, School of Forestry, Northeast Forestry University, Harbin 150040, Heilongjiang, P. R. China; <sup>2</sup>Key Laboratory of Sustainable Forest Ecosystem Management-Ministry of Education, Northeast Forestry University, Harbin 150040, Heilongjiang, P. R. China;

\*Corresponding author.

§These authors contributed equally to this work.

E-mail addresses: qiaolichen@nefu.edu.cn (Q. Chen), zhangruizhi@nefu.edu.cn (R. Zhang), danleili@nefu.edu.cn (D. Li), fengwang@nefu.edu.cn (F. Wang).

Table S1 Statistical analysis of the RNA sequencing data.

Table S2 Number of genes in each module.

Table S3 Genes with the top 30 highest IC values in the pink module.

Table S4 Forty-Two network genes for the pink module.

Table S5 Top 30 genes with the highest weight value to each of the 7 genes.

Table S6 Primers used in this study.

Fig. S1 Clustering dendrogram of samples based on their Euclidean distance.

Fig. S2 Analysis of network topology with various soft-thresholding powers.

Fig. S3 Visualization of the gene network using a heatmap plot.

Fig. S4 Module eigengene expression profile.

Fig. S5 Bar plot of module significance defined as the mean gene significance across all genes in the module to the DJ3-field trait.

Figure S6. GO enrichment analysis (Biology Process) of the genes in the pink and magenta modules.

Figure S7. GO enrichment analysis (Cellular Component) of the genes in the pink and magenta modules.

Figure S8. GO enrichment analysis (Molecular Function) of the genes in the pink and magenta modules.

Figure S9. KEGG enrichment analysis of the genes in the pink and magenta modules.

Figure S10. Visualization of the pink module (weight>0.3).

Table S1 Statistical analysis of the RNA sequencing data.

| Samples     | Clean Reads | Clean Reads | Clean Reads | Gene Mapping |
|-------------|-------------|-------------|-------------|--------------|
|             | Number      | Rate (%)    | Q20 (%)     | Rate (%)     |
| J2-1        | 22,133,728  | 99.62       | 97.50       | 71.27        |
| J2-2        | 22,203,673  | 99.94       | 97.38       | 71.64        |
| J2-3        | 24,112,070  | 99.90       | 97.94       | 71.58        |
| J3-1        | 24,057,741  | 99.67       | 97.20       | 75.77        |
| J3-2        | 24,145,341  | 99.56       | 97.64       | 74.66        |
| J3-3        | 23,985,362  | 99.48       | 97.67       | 75.13        |
| J4-1        | 24,037,515  | 99.59       | 96.90       | 76.96        |
| J4-2        | 23,465,363  | 99.65       | 97.64       | 76.68        |
| J4-3        | 24,013,521  | 99.56       | 97.68       | 76.84        |
| Female-1    | 23,960,379  | 99.26       | 95.30       | 78.06        |
| Female-2    | 24,013,135  | 99.46       | 97.34       | 78.99        |
| Female-3    | 23,961,244  | 99.75       | 97.42       | 78.56        |
| Male-1      | 21,359,122  | 99.41       | 94.80       | 76.86        |
| Male-2      | 22,063,153  | 99.53       | 96.57       | 76.96        |
| Male-3      | 21,624,233  | 99.75       | 97.31       | 76.66        |
| J2-2-1      | 24,110,169  | 99.89       | 97.90       | 59.92        |
| J2-2-2      | 23,951,367  | 99.39       | 97.86       | 64.57        |
| J2-2-3      | 24,061,351  | 99.86       | 97.34       | 62.44        |
| DJ3-lab-1   | 24,018,211  | 99.51       | 97.10       | 75.94        |
| DJ3-lab-2   | 23,996,384  | 99.42       | 97.00       | 74.01        |
| DJ3-lab-3   | 23,940,211  | 99.80       | 98.40       | 73.51        |
| DJ3-field-1 | 23,821,746  | 99.21       | 98.60       | 73.39        |
| DJ3-field-2 | 23,971,254  | 99.12       | 98.41       | 73.89        |
| DJ3-field-3 | 23,814,547  | 99.39       | 98.76       | 74.06        |
| DJ4-1       | 22,051,038  | 91.38       | 98.44       | 66.51        |
| DJ4-2       | 23,023,245  | 95.89       | 98.76       | 67.88        |

DJ4-3

22,415,547

96.76

98.42

67.69

---

Table S2 Number of genes in each module.

| Module      | Gene number |
|-------------|-------------|
| <hr/>       |             |
| colors      |             |
| <hr/>       |             |
| black       | 603         |
| blue        | 2639        |
| brown       | 2589        |
| cyan        | 143         |
| green       | 1010        |
| greenyellow | 234         |
| grey        | 20          |
| magenta     | 533         |
| pink        | 583         |
| purple      | 437         |
| red         | 789         |
| salmon      | 158         |
| tan         | 202         |
| turquoise   | 4775        |
| yellow      | 1148        |
| <hr/>       |             |

Table S3 Genes with the top 30 highest IC values in the pink module.

| No. | Gene annotation       | IC          | Homologous protein<br>GenBank ID | Protein name                                                                                               | Blast nr<br>p-value        |
|-----|-----------------------|-------------|----------------------------------|------------------------------------------------------------------------------------------------------------|----------------------------|
| 1   | <i>cath1-6</i>        | 159.5326073 | AID50178.1                       | cysteine protease family cathepsin 1<br>[ <i>Bursaphelenchus mucronatus</i> ]                              | $3.4518 \times 10^{-108}$  |
| 2   | <i>O-Gly-hydro30</i>  | 158.3084016 | EPB74230.1                       | O-Glycosyl hydrolase family 30<br>[ <i>Ancylostoma ceylanicum</i> ]                                        | $1.59787 \times 10^{-80}$  |
| 3   | <i>asp</i>            | 157.6912185 | KJH53579.1                       | eukaryotic aspartyl protease<br>[ <i>Dictyocaulus viviparus</i> ]                                          | $2.08533 \times 10^{-23}$  |
| 4   | <i>gst-33</i>         | 155.5006374 | ABN64198.1                       | glutathione S-transferase-1<br>[ <i>Meloidogyne incognita</i> ]                                            | $3.11943 \times 10^{-22}$  |
| 5   | <i>cath1-5</i>        | 154.8696696 | AID50178.1                       | cysteine protease family cathepsin 1<br>[ <i>Bursaphelenchus mucronatus</i> ]                              | $1.31168 \times 10^{-107}$ |
| 6   | <i>CBN-DHS-2</i>      | 154.3596573 | EGT37950.1                       | CBN-DHS-2 protein<br>[ <i>Caenorhabditis brenneri</i> ]<br>Glycoside hydrolase domain                      | $4.56842 \times 10^{-68}$  |
| 7   | <i>Gly-hydro</i>      | 153.8170115 | CDJ96960.1                       | containing protein<br>[ <i>Haemonchus contortus</i> ]                                                      | $4.85292 \times 10^{-21}$  |
| 8   | <i>str-124</i>        | 153.2131533 | CEF64053.1                       | 7TM GPCR, serpentine receptor class<br>r (Str) family-containing protein<br>[ <i>Strongyloides ratti</i> ] | $2.54895 \times 10^{-06}$  |
| 9   | <i>gst-36</i>         | 152.0856442 | KKA74463.1                       | Glutathione S-transferase<br>[ <i>Pristionchus pacificus</i> ]                                             | $1.8039 \times 10^{-15}$   |
| 10  | <i>irld-39</i>        | 151.0613212 | -                                | -                                                                                                          | -                          |
| 11  | <i>BUX.s01254.113</i> | 150.5725348 | -                                | -                                                                                                          | -                          |
| 12  | <i>BUX.s01149.55</i>  | 150.4648858 | -                                | -                                                                                                          | -                          |
| 13  | <i>cath1-4</i>        | 149.3657473 | AID50178.1                       | cysteine protease family cathepsin 1<br>[ <i>Bursaphelenchus mucronatus</i> ]                              | $1.10675 \times 10^{-90}$  |
| 14  | <i>BUX.s00460.305</i> | 149.1136527 | -                                | -                                                                                                          | -                          |
| 15  | <i>scl-13</i>         | 148.7282799 | ADG86239.1                       | venom allergen-like protein VAP3<br>[ <i>Bursaphelenchus xylophilus</i> ]                                  | $1.09812 \times 10^{-120}$ |
| 16  | <i>BUX.s01149.58</i>  | 148.0852976 | -                                | -                                                                                                          | -                          |
| 17  | <i>cra-1</i>          | 147.8092805 | XP_00314786<br>5.1               | hypothetical protein LOAG_12304<br>[ <i>Loa loa</i> ]                                                      | $7.65088 \times 10^{-45}$  |
| 18  | <i>cath1-1</i>        | 147.4758269 | AID50178.1                       | cysteine protease family cathepsin 1                                                                       | $6.95176 \times 10^{-76}$  |

---

|    |                       |             |                    |                                       |                            |
|----|-----------------------|-------------|--------------------|---------------------------------------|----------------------------|
|    |                       |             |                    | [ <i>Bursaphelenchus mucronatus</i> ] |                            |
| 19 | <i>cath1-3</i>        | 147.2517936 | AID50178.1         | cysteine protease family cathepsin 1  | 1.05473×10 <sup>-41</sup>  |
|    |                       |             |                    | [ <i>Bursaphelenchus mucronatus</i> ] |                            |
|    |                       |             |                    | hypothetical protein                  |                            |
| 20 | <i>BUX.s00609.55</i>  | 146.8648011 | EYB86268.1         | Y032_0282g1277                        | 2.65302×10 <sup>-149</sup> |
|    |                       |             |                    | [ <i>Ancylostoma ceylanicum</i> ]     |                            |
| 21 | <i>BUX.s01281.196</i> | 146.791013  | -                  | -                                     | -                          |
| 22 | <i>spp-20</i>         | 146.6361924 | -                  | -                                     | -                          |
| 23 | <i>BUX.s01149.57</i>  | 146.4990787 | -                  | -                                     | -                          |
|    |                       |             |                    | CBN-SODH-2 protein                    |                            |
| 24 | <i>Cbn-sodh-2</i>     | 145.7646357 | EGT60304.1         | [ <i>Caenorhabditis brenneri</i> ]    | 4.08829×10 <sup>-91</sup>  |
|    |                       |             |                    | hypothetical protein CRE_26128        |                            |
| 25 | <i>BUX.s01254.340</i> | 145.7577156 | XP_00311361<br>7.1 | [ <i>Caenorhabditis remanei</i> ]     | 2.91415×10 <sup>-54</sup>  |
|    |                       |             |                    | cysteine protease family cathepsin 1  |                            |
| 26 | <i>cath1-8</i>        | 145.1472441 | AID50178.1         | [ <i>Bursaphelenchus mucronatus</i> ] | 3.33012×10 <sup>-103</sup> |
| 27 | <i>BUX.s00773.12</i>  | 145.1195146 | -                  | -                                     | -                          |
|    |                       |             |                    | Src homology-3 and Tyrosine protein   |                            |
| 28 | <i>Src-3</i>          | 144.8323753 | CDJ86525.1         | kinase domain containing protein      | 2.25183×10 <sup>-61</sup>  |
|    |                       |             |                    | [ <i>Haemonchus contortus</i> ]       |                            |
| 29 | <i>BUX.s01066.169</i> | 144.7103838 | -                  | -                                     | -                          |
|    |                       |             |                    | Acyl-CoA synthetase family member     |                            |
| 30 | <i>acs-14</i>         | 144.5409195 | CEF60576.1         | 2,mitochondrial                       | 3.21114×10 <sup>-76</sup>  |
|    |                       |             |                    | [ <i>Strongyloides ratti</i> ]        |                            |

---

Table S4 Forty-two network genes for the pink module.

| No. | Gene annotation      | IC              | GS                  | MM                  | log <sub>2</sub> fold | Homologous protein<br>GenBank ID | Protein name                                                                                            | Blast nr<br>p-value       |
|-----|----------------------|-----------------|---------------------|---------------------|-----------------------|----------------------------------|---------------------------------------------------------------------------------------------------------|---------------------------|
| 1   | <i>cath1-6</i>       | 159.532<br>6073 | 0.988<br>8461<br>64 | 0.974<br>1623<br>11 | 4.44657<br>8165       | AID50178.1                       | cysteine protease family cathepsin 1<br>[ <i>Bursaphelenchus mucronatus</i> ]                           | 3.4518×10 <sup>-108</sup> |
| 2   | <i>O-Gly-hydro30</i> | 158.308<br>4016 | 0.950<br>9804<br>28 | 0.982<br>3716<br>7  | 2.39027<br>4998       | EPB74230.1                       | O-Glycosyl hydrolase family 30 [ <i>Ancylostoma ceylanicum</i> ]                                        | 1.59787×10 <sup>-80</sup> |
| 3   | <i>asp</i>           | 157.691<br>2185 | 0.940<br>3891<br>2  | 0.987<br>0788<br>93 | 2.78486<br>744        | KJH53579.1                       | eukaryotic aspartyl protease [ <i>Dictyocaulus viviparus</i> ]                                          | 2.08533×10 <sup>-23</sup> |
| 4   | <i>gst-33</i>        | 155.500<br>6374 | 0.946<br>2089<br>04 | 0.976<br>7892<br>13 | 3.84479<br>9544       | ABN64198.1                       | glutathione S-transferase-1 [ <i>Meloidogyne incognita</i> ]                                            | 3.11943×10 <sup>-22</sup> |
| 5   | <i>cath1-5</i>       | 154.869<br>6696 | 0.986<br>5229<br>44 | 0.968<br>3950<br>33 | 4.44562<br>1127       | AID50178.1                       | cysteine protease family cathepsin 1<br>[ <i>Bursaphelenchus mucronatus</i> ]                           | 1.3117×10 <sup>-107</sup> |
| 6   | <i>CBN-DHS-2</i>     | 154.359<br>6573 | 0.987<br>0170<br>29 | 0.962<br>9187<br>69 | 4.49275<br>9739       | EGT37950.1                       | CBN-DHS-2 protein<br>[ <i>Caenorhabditis brenneri</i> ]                                                 | 4.56842×10 <sup>-68</sup> |
| 7   | <i>Gly-hydro</i>     | 153.817<br>0115 | 0.951<br>2587<br>29 | 0.973<br>1865<br>85 | 2.69764<br>4098       | CDJ96960.1                       | Glycoside hydrolase domain containing protein<br>[ <i>Haemonchus contortus</i> ]                        | 4.85292×10 <sup>-21</sup> |
| 8   | <i>str-124</i>       | 153.213<br>1533 | 0.973<br>0703<br>6  | 0.971<br>1502<br>09 | 3.94337<br>6809       | CEF64053.1                       | 7TM GPCR, serpentine receptor class r (Str)<br>family-containing protein [ <i>Strongyloides ratti</i> ] | 2.54895×10 <sup>-06</sup> |
| 9   | <i>gst-36</i>        | 152.085<br>6442 | 0.988<br>2188       | 0.958<br>1010       | 4.83776<br>1218       | KKA74463.1                       | Glutathione S-transferase [ <i>Pristionchus pacificus</i> ]                                             | 1.8039×10 <sup>-15</sup>  |



|    |                       |         |         |       |         |            |                                       |                           |
|----|-----------------------|---------|---------|-------|---------|------------|---------------------------------------|---------------------------|
|    |                       |         | 59      | 89    |         |            |                                       |                           |
|    |                       |         | 0.958   | 0.966 |         |            |                                       |                           |
| 10 | <i>irld-39</i>        | 151.061 | 5539    | 8325  | 4.05568 | -          | -                                     | -                         |
|    |                       | 3212    |         |       | 5227    |            |                                       |                           |
|    |                       |         | 26      | 36    |         |            |                                       |                           |
|    |                       |         | 0.985   | 0.961 |         |            |                                       |                           |
| 11 | <i>BUX.s01254.113</i> | 150.572 | 3235    | 5258  | 4.23168 | -          | -                                     | -                         |
|    |                       | 5348    |         |       | 163     |            |                                       |                           |
|    |                       |         | 67      | 05    |         |            |                                       |                           |
|    |                       |         | 0.990   | 0.955 |         |            |                                       |                           |
| 12 | <i>BUX.s01149.55</i>  | 150.464 | 3836    | 3638  | 6.91651 | -          | -                                     | -                         |
|    |                       | 8858    |         |       | 6288    |            |                                       |                           |
|    |                       |         | 67      | 66    |         |            |                                       |                           |
|    |                       |         | 0.987   | 0.953 |         |            |                                       |                           |
| 13 | <i>cath1-4</i>        | 149.365 | 9976    | 1478  | 6.78676 | AID50178.1 | cysteine protease family cathepsin 1  | 1.10675×10 <sup>-90</sup> |
|    |                       | 7473    |         |       | 5412    |            | [ <i>Bursaphelenchus mucronatus</i> ] |                           |
|    |                       |         | 92      | 69    |         |            |                                       |                           |
|    |                       |         | 0.996   | 0.950 |         |            |                                       |                           |
| 14 | <i>scl-13</i>         | 148.728 | 7551    | 5994  | 7.98818 | ADG86239.1 | venom allergen-like protein VAP3      | 1.0981×10 <sup>-120</sup> |
|    |                       | 2799    |         |       | 8299    |            | [ <i>Bursaphelenchus xylophilus</i> ] |                           |
|    |                       |         | 48      | 58    |         |            |                                       |                           |
|    |                       |         | 0.991   | 0.951 |         |            |                                       |                           |
| 15 | <i>BUX.s01149.58</i>  | 148.085 | 3973    | 4531  | 6.71587 | -          | -                                     | -                         |
|    |                       | 2976    |         |       | 8015    |            |                                       |                           |
|    |                       |         | 61      | 04    |         |            |                                       |                           |
|    |                       |         | 0.980   | 0.951 |         |            |                                       |                           |
| 16 | <i>cath1-1</i>        | 147.475 | 6078    | 0798  | 6.19801 | AID50178.1 | cysteine protease family cathepsin 1  | 6.95176×10 <sup>-76</sup> |
|    |                       | 8269    |         |       | 2395    |            | [ <i>Bursaphelenchus mucronatus</i> ] |                           |
|    |                       |         | 84      | 09    |         |            |                                       |                           |
|    |                       |         | 0.983   | 0.950 |         |            |                                       |                           |
| 17 | <i>cath1-3</i>        | 147.251 | 4606    | 3217  | 6.73070 | AID50178.1 | cysteine protease family cathepsin 1  | 1.05473×10 <sup>-41</sup> |
|    |                       | 7936    |         |       | 1785    |            | [ <i>Bursaphelenchus mucronatus</i> ] |                           |
|    |                       |         | 7       | 45    |         |            |                                       |                           |
|    |                       |         | 0.972   | 0.959 |         |            |                                       |                           |
| 18 | <i>BUX.s01281.196</i> | 146.791 | 2815    | 7139  | 3.66956 | -          | -                                     | -                         |
|    |                       | 013     |         |       | 6309    |            |                                       |                           |
|    |                       |         | 84      | 11    |         |            |                                       |                           |
|    |                       |         | 0.991   | 0.948 |         |            |                                       |                           |
| 19 | <i>BUX.s01149.57</i>  | 146.499 | 9.20532 |       |         | -          | -                                     | -                         |

|    |                       |         |       |       |         |            |                                                                               |                           |
|----|-----------------------|---------|-------|-------|---------|------------|-------------------------------------------------------------------------------|---------------------------|
|    |                       | 0787    | 6523  | 3568  | 3331    |            |                                                                               |                           |
|    |                       |         | 69    | 76    |         |            |                                                                               |                           |
|    |                       |         | 0.960 | 0.958 |         |            |                                                                               |                           |
| 20 | <i>Cbn-sodh-2</i>     | 145.764 | 1241  | 6094  | 4.89620 | EGT60304.1 | CBN-SODH-2 protein [ <i>Caenorhabditis brenneri</i> ]                         | 4.08829×10 <sup>-91</sup> |
|    |                       | 6357    | 54    | 79    | 0997    |            |                                                                               |                           |
|    |                       |         | 0.998 | 0.945 |         |            |                                                                               |                           |
| 21 | <i>BUX.s00773.12</i>  | 145.119 | 2008  | 0503  | 7.07993 | -          | -                                                                             | -                         |
|    |                       | 5146    | 34    | 3     | 3101    |            |                                                                               |                           |
|    |                       |         | 0.994 | 0.947 |         |            | Src homology-3 and Tyrosine protein kinase                                    |                           |
| 22 | <i>Src-3</i>          | 144.832 | 6294  | 7664  | 4.10500 | CDJ86525.1 | domain containing protein [ <i>Haemonchus contortus</i> ]                     | 2.25183×10 <sup>-61</sup> |
|    |                       | 3753    | 95    | 82    | 8558    |            |                                                                               |                           |
|    |                       |         | 0.992 | 0.944 |         |            |                                                                               |                           |
| 23 | <i>BUX.s01066.169</i> | 144.710 | 3626  | 0953  | 5.38064 | -          | -                                                                             | -                         |
|    |                       | 3838    | 62    | 88    | 778     |            |                                                                               |                           |
|    |                       |         | 0.998 | 0.943 |         |            |                                                                               |                           |
| 24 | <i>BUX.s00713.823</i> | 144.338 | 3589  | 1689  | 6.39806 | -          | -                                                                             | -                         |
|    |                       | 3328    | 89    | 68    | 5219    |            |                                                                               |                           |
|    |                       |         | 0.971 | 0.946 |         |            |                                                                               |                           |
| 25 | <i>cath1-2</i>        | 144.119 | 2929  | 1234  | 5.44816 | AID50178.1 | cysteine protease family cathepsin 1<br>[ <i>Bursaphelenchus mucronatus</i> ] | 5.50549×10 <sup>-82</sup> |
|    |                       | 9535    | 13    | 93    | 7269    |            |                                                                               |                           |
|    |                       |         | 0.985 | 0.942 |         |            |                                                                               |                           |
| 26 | <i>Pank-1</i>         | 143.634 | 9661  | 1577  | 3.71687 | KHN77364.1 | Pantothenate kinase 1<br>[ <i>Toxocara canis</i> ]                            | 7.8244×10 <sup>-146</sup> |
|    |                       | 1537    | 58    | 74    | 8439    |            |                                                                               |                           |
|    |                       |         | 0.991 | 0.945 |         |            |                                                                               |                           |
| 27 | <i>asp-14</i>         | 142.773 | 2012  | 4153  | 4.67688 | -          | -                                                                             | -                         |
|    |                       | 9429    | 39    | 66    | 499     |            |                                                                               |                           |
|    |                       |         | 0.979 | 0.951 |         |            |                                                                               |                           |
| 28 | <i>BUX.s01038.42</i>  | 142.562 | 7551  | 4480  | 4.54819 | -          | -                                                                             | -                         |
|    |                       | 0508    | 13    | 53    | 314     |            |                                                                               |                           |

|    |                        |         |       |       |         |            |                                                       |                           |
|----|------------------------|---------|-------|-------|---------|------------|-------------------------------------------------------|---------------------------|
|    |                        |         | 0.969 | 0.949 | 4.37019 |            |                                                       |                           |
| 29 | <i>oac-29</i>          | 142.343 | 7280  | 7735  |         | -          | -                                                     | -                         |
|    |                        | 4777    |       |       | 5752    |            |                                                       |                           |
|    |                        |         | 86    | 71    |         |            |                                                       |                           |
|    |                        |         |       | 0.941 |         |            |                                                       |                           |
| 30 | <i>cath1-7</i>         | 140.082 | 0.974 | 3329  | 6.57930 | AID50178.1 | cysteine protease family cathepsin 1                  | 5.13471×10 <sup>-15</sup> |
|    |                        | 6661    | 976   |       | 3266    |            | [ <i>Bursaphelenchus mucronatus</i> ]                 |                           |
|    |                        |         |       | 97    |         |            |                                                       |                           |
|    |                        |         | 0.968 | 0.934 |         |            |                                                       |                           |
| 31 | <i>acsf2</i>           | 140.013 | 4026  | 4594  | 3.04828 | KHN84146.1 | Acyl-CoA synthetase family member 2,                  | 1.5861×10 <sup>-180</sup> |
|    |                        | 4726    |       |       | 4161    |            | mitochondrial [ <i>Toxocara canis</i> ]               |                           |
|    |                        |         | 14    | 28    |         |            |                                                       |                           |
|    |                        |         | 0.976 | 0.940 |         |            |                                                       |                           |
| 32 | <i>BUX.s00110.118</i>  | 137.832 | 5632  | 9960  | 3.89475 | -          | -                                                     | -                         |
|    |                        | 0848    |       |       | 684     |            |                                                       |                           |
|    |                        |         | 87    | 49    |         |            |                                                       |                           |
|    |                        |         | 0.985 | 0.932 |         |            |                                                       |                           |
| 33 | <i>sbp-1</i>           | 136.874 | 6165  | 6526  | 3.01863 | KHN86442.1 | Sterol regulatory element-binding protein 1           | 2.28728×10 <sup>-25</sup> |
|    |                        | 8978    |       |       | 2387    |            | [ <i>Toxocara canis</i> ]                             |                           |
|    |                        |         | 22    | 06    |         |            |                                                       |                           |
|    |                        |         | 0.967 | 0.939 |         |            |                                                       |                           |
| 34 | <i>epg-5</i>           | 135.361 | 2641  | 0191  | 4.76001 | -          | -                                                     | -                         |
|    |                        | 8996    |       |       | 2785    |            |                                                       |                           |
|    |                        |         | 58    | 32    |         |            |                                                       |                           |
|    |                        |         | 0.979 | 0.918 |         |            |                                                       |                           |
| 35 | <i>BUX.s00773.15</i>   | 127.820 | 7985  | 7912  | 4.49593 | -          | -                                                     | -                         |
|    |                        | 6086    |       |       | 605     |            |                                                       |                           |
|    |                        |         | 01    | 47    |         |            |                                                       |                           |
|    |                        |         | 0.953 | 0.916 |         |            |                                                       |                           |
| 36 | <i>acetyl-CoA</i>      | 124.517 | 4988  | 1128  | 2.67151 | CEF71468.1 | Carboxyl transferase domain and Biotin                | 0                         |
|    |                        | 7749    |       |       | 04      |            | [ <i>Strongyloides ratti</i> ]                        |                           |
|    |                        |         | 58    | 18    |         |            |                                                       |                           |
|    |                        |         | 0.969 | 0.901 |         |            |                                                       |                           |
| 37 | <i>Ddram-1</i>         | 122.893 | 9785  | 7335  | 3.54205 | KHN72428.1 | DNA damage-regulated autophagy modulator              | 7.98356×10 <sup>-22</sup> |
|    |                        | 0373    |       |       | 3909    |            | protein 1                                             |                           |
|    |                        |         | 49    | 66    |         |            | [ <i>Toxocara canis</i> ]                             |                           |
|    |                        |         | 0.969 | 0.900 |         |            |                                                       |                           |
| 38 | <i>acetyl-coenzyme</i> | 120.900 | 0489  | 4126  | 3.11945 | ERG80270.1 | acetyl-coenzyme a cytoplasmic [ <i>Ascaris suum</i> ] | 4.10816×10 <sup>-53</sup> |
|    |                        | 9149    |       |       | 8652    |            |                                                       |                           |

---

|    |                 |         |       |       |         |            |                                                                         |                           |
|----|-----------------|---------|-------|-------|---------|------------|-------------------------------------------------------------------------|---------------------------|
|    |                 |         | 17    | 35    |         |            |                                                                         |                           |
| 39 | <i>fae5</i>     | 113.140 | 0.951 | 0.884 | 2.58130 | EJW88645.1 | fatty acid elongation protein 5 [ <i>Wuchereria bancrofti</i> ]         | 1.41793×10 <sup>-84</sup> |
|    |                 | 987     | 0620  | 9645  | 6214    |            |                                                                         |                           |
|    |                 |         | 62    | 75    |         |            |                                                                         |                           |
| 40 | <i>elo-6</i>    | 112.933 | 0.950 | 0.883 | 2.58735 | XP_0026338 | <i>C. briggsae</i> CBR-ELO-6 protein [ <i>Caenorhabditis briggsae</i> ] | 4.38478×10 <sup>-78</sup> |
|    |                 | 2421    | 4359  | 6312  | 458     | 91.1       |                                                                         |                           |
|    |                 |         | 31    | 75    |         |            |                                                                         |                           |
| 41 | <i>ALDH2</i>    | 108.130 | 0.943 | 0.876 | 2.32379 | KHN86680.1 | Aldehyde dehydrogenase, mitochondrial [ <i>Toxocara canis</i> ]         | 0                         |
|    |                 | 3498    | 4452  | 5214  | 6869    |            |                                                                         |                           |
|    |                 |         | 8     | 63    |         |            |                                                                         |                           |
| 42 | <i>tmem-135</i> | 97.0444 | 0.936 | 0.861 | 2.89669 | NP_508800. | TMEM (human TransMEMbrane protein) homolog                              | 1.24721×10 <sup>-40</sup> |
|    |                 | 7902    | 1454  | 9866  | 8411    | 2          |                                                                         |                           |
|    |                 |         | 96    | 89    |         |            | [ <i>Caenorhabditis elegans</i> ]                                       |                           |

---

Table S5 Top 30 genes with the highest weight value to each of the 7 genes.

| No. | Number of genes | Number of genes | Weight value |
|-----|-----------------|-----------------|--------------|
| 1   | 21              | 1               | 0.492137315  |
| 2   | 14              | 1               | 0.48994234   |
| 3   | 19              | 1               | 0.489799172  |
| 4   | 1               | 24              | 0.488884436  |
| 5   | 15              | 1               | 0.487896545  |
| 6   | 13              | 1               | 0.486417876  |
| 7   | 13              | 1               | 0.486417876  |
| 8   | 12              | 1               | 0.486246042  |
| 9   | 1               | 38              | 0.486233078  |
| 10  | 1               | 22              | 0.485689578  |
| 11  | 30              | 1               | 0.485672596  |
| 12  | 30              | 1               | 0.485672596  |
| 13  | 17              | 1               | 0.485275634  |
| 14  | 17              | 1               | 0.485275634  |
| 15  | 16              | 1               | 0.482392852  |
| 16  | 16              | 1               | 0.482392852  |
| 17  | 1               | 35              | 0.48210381   |
| 18  | 9               | 1               | 0.481253274  |
| 19  | 1               | 27              | 0.480864513  |
| 20  | 13              | 6               | 0.480119286  |
| 21  | 1               | 26              | 0.480107618  |
| 22  | 1               | 11              | 0.479618217  |
| 23  | 17              | 6               | 0.479410971  |
| 24  | 30              | 6               | 0.479314339  |
| 25  | 32              | 1               | 0.479200002  |
| 26  | 23              | 1               | 0.478527701  |
| 27  | 6               | 1               | 0.478405224  |

---

|    |    |    |             |
|----|----|----|-------------|
| 28 | 21 | 5  | 0.477791704 |
| 29 | 25 | 1  | 0.477422573 |
| 30 | 25 | 1  | 0.477422573 |
| 31 | 34 | 1  | 0.476765546 |
| 32 | 16 | 6  | 0.476657717 |
| 33 | 14 | 5  | 0.476154436 |
| 34 | 1  | 5  | 0.475697258 |
| 35 | 1  | 5  | 0.475697258 |
| 36 | 5  | 24 | 0.475196268 |
| 37 | 19 | 5  | 0.474910561 |
| 38 | 15 | 5  | 0.474557232 |
| 39 | 1  | 36 | 0.474272405 |
| 40 | 13 | 12 | 0.473994688 |
| 41 | 30 | 12 | 0.473905776 |
| 42 | 30 | 9  | 0.473658176 |
| 43 | 13 | 9  | 0.47357636  |
| 44 | 17 | 12 | 0.473520511 |
| 45 | 37 | 1  | 0.473350111 |
| 46 | 13 | 38 | 0.473160544 |
| 47 | 17 | 9  | 0.473133572 |
| 48 | 13 | 19 | 0.473009983 |
| 49 | 13 | 21 | 0.472701187 |
| 50 | 5  | 22 | 0.472496483 |
| 51 | 13 | 5  | 0.472444688 |
| 52 | 13 | 5  | 0.472444688 |
| 53 | 25 | 6  | 0.472428799 |
| 54 | 13 | 14 | 0.472399877 |
| 55 | 12 | 5  | 0.47222922  |
| 56 | 28 | 1  | 0.472021812 |

---

---

|    |    |    |             |
|----|----|----|-------------|
| 57 | 13 | 15 | 0.471611443 |
| 58 | 13 | 24 | 0.471138116 |
| 59 | 30 | 13 | 0.47112965  |
| 60 | 30 | 13 | 0.47112965  |
| 61 | 16 | 9  | 0.470966846 |
| 62 | 16 | 12 | 0.470922726 |
| 63 | 5  | 38 | 0.470806323 |
| 64 | 17 | 13 | 0.470653266 |
| 65 | 17 | 13 | 0.470653266 |
| 66 | 17 | 5  | 0.470506191 |
| 67 | 17 | 5  | 0.470506191 |
| 68 | 30 | 14 | 0.470475606 |
| 69 | 1  | 33 | 0.470208337 |
| 70 | 17 | 14 | 0.470091778 |
| 71 | 30 | 5  | 0.469789444 |
| 72 | 30 | 5  | 0.469789444 |
| 73 | 1  | 42 | 0.469625388 |
| 74 | 29 | 1  | 0.469077662 |
| 75 | 5  | 35 | 0.468628749 |
| 76 | 13 | 16 | 0.468608779 |
| 77 | 13 | 16 | 0.468608779 |
| 78 | 16 | 5  | 0.468531731 |
| 79 | 16 | 5  | 0.468531731 |
| 80 | 5  | 27 | 0.467683275 |
| 81 | 16 | 14 | 0.467508077 |
| 82 | 25 | 9  | 0.467296145 |
| 83 | 9  | 5  | 0.467250861 |
| 84 | 25 | 12 | 0.467183058 |
| 85 | 5  | 26 | 0.467022205 |

---

---

|     |    |    |             |
|-----|----|----|-------------|
| 86  | 17 | 38 | 0.466919423 |
| 87  | 1  | 41 | 0.466721319 |
| 88  | 5  | 11 | 0.4665363   |
| 89  | 17 | 19 | 0.466387739 |
| 90  | 30 | 15 | 0.466211256 |
| 91  | 17 | 15 | 0.466056341 |
| 92  | 23 | 5  | 0.465923046 |
| 93  | 17 | 30 | 0.465491621 |
| 94  | 17 | 30 | 0.465491621 |
| 95  | 17 | 21 | 0.465326736 |
| 96  | 30 | 19 | 0.465324422 |
| 97  | 25 | 13 | 0.465300432 |
| 98  | 25 | 13 | 0.465300432 |
| 99  | 6  | 5  | 0.465054954 |
| 100 | 13 | 11 | 0.464746157 |
| 101 | 16 | 38 | 0.464583938 |
| 102 | 13 | 22 | 0.464408186 |
| 103 | 15 | 16 | 0.464076411 |
| 104 | 32 | 5  | 0.464003618 |
| 105 | 16 | 19 | 0.463967446 |
| 106 | 17 | 24 | 0.463675797 |
| 107 | 17 | 11 | 0.463336156 |
| 108 | 30 | 16 | 0.463303646 |
| 109 | 30 | 16 | 0.463303646 |
| 110 | 25 | 5  | 0.463233787 |
| 111 | 25 | 5  | 0.463233787 |
| 112 | 13 | 26 | 0.463064092 |
| 113 | 30 | 11 | 0.463038036 |
| 114 | 17 | 16 | 0.462781084 |

---



---

|     |    |    |             |
|-----|----|----|-------------|
| 115 | 17 | 16 | 0.462781084 |
| 116 | 25 | 14 | 0.462730003 |
| 117 | 13 | 35 | 0.462584436 |
| 118 | 21 | 16 | 0.462499118 |
| 119 | 37 | 5  | 0.462364065 |
| 120 | 34 | 5  | 0.461380517 |
| 121 | 16 | 11 | 0.46129075  |
| 122 | 16 | 24 | 0.461242755 |
| 123 | 5  | 36 | 0.460912942 |
| 124 | 13 | 36 | 0.460811926 |
| 125 | 13 | 37 | 0.46063131  |
| 126 | 30 | 21 | 0.460506513 |
| 127 | 25 | 15 | 0.459976306 |
| 128 | 17 | 25 | 0.459520409 |
| 129 | 17 | 25 | 0.459520409 |
| 130 | 13 | 2  | 0.459238335 |
| 131 | 25 | 16 | 0.458803845 |
| 132 | 25 | 16 | 0.458803845 |
| 133 | 30 | 24 | 0.458773489 |
| 134 | 13 | 34 | 0.458591772 |
| 135 | 13 | 23 | 0.458472272 |
| 136 | 17 | 2  | 0.458317814 |
| 137 | 13 | 27 | 0.458166764 |
| 138 | 30 | 2  | 0.458037937 |
| 139 | 5  | 33 | 0.457827981 |
| 140 | 28 | 5  | 0.457505494 |
| 141 | 25 | 19 | 0.457300119 |
| 142 | 5  | 42 | 0.457013271 |
| 143 | 13 | 8  | 0.456921826 |

---

---

|     |    |    |             |
|-----|----|----|-------------|
| 144 | 25 | 11 | 0.456916109 |
| 145 | 13 | 42 | 0.456592284 |
| 146 | 13 | 32 | 0.456564496 |
| 147 | 29 | 5  | 0.45623694  |
| 148 | 17 | 22 | 0.456161126 |
| 149 | 16 | 2  | 0.455921579 |
| 150 | 17 | 8  | 0.455750052 |
| 151 | 17 | 26 | 0.455598375 |
| 152 | 13 | 40 | 0.455461228 |
| 153 | 30 | 8  | 0.455365744 |
| 154 | 5  | 41 | 0.455096719 |
| 155 | 13 | 39 | 0.45476396  |
| 156 | 17 | 35 | 0.454539959 |
| 157 | 16 | 36 | 0.454405726 |
| 158 | 16 | 22 | 0.453921104 |
| 159 | 16 | 26 | 0.453742428 |
| 160 | 17 | 23 | 0.453574309 |
| 161 | 17 | 7  | 0.453353921 |
| 162 | 17 | 36 | 0.453341156 |
| 163 | 30 | 23 | 0.45332145  |
| 164 | 30 | 7  | 0.453297609 |
| 165 | 16 | 8  | 0.452917617 |
| 166 | 30 | 26 | 0.452673928 |
| 167 | 17 | 37 | 0.452647503 |
| 168 | 17 | 34 | 0.45262933  |
| 169 | 25 | 38 | 0.452097024 |
| 170 | 30 | 25 | 0.451991066 |
| 171 | 30 | 25 | 0.451991066 |
| 172 | 16 | 7  | 0.451978798 |

---

---

|     |    |    |             |
|-----|----|----|-------------|
| 173 | 16 | 35 | 0.451837711 |
| 174 | 25 | 2  | 0.45144753  |
| 175 | 25 | 21 | 0.451259305 |
| 176 | 16 | 37 | 0.451053463 |
| 177 | 30 | 22 | 0.45079755  |
| 178 | 23 | 16 | 0.450655766 |
| 179 | 25 | 7  | 0.450123176 |
| 180 | 25 | 24 | 0.450117136 |
| 181 | 17 | 27 | 0.450091837 |
| 182 | 17 | 32 | 0.449604669 |
| 183 | 16 | 34 | 0.449432102 |
| 184 | 16 | 42 | 0.449311923 |
| 185 | 17 | 42 | 0.448864586 |
| 186 | 25 | 8  | 0.447698177 |
| 187 | 17 | 40 | 0.447431316 |
| 188 | 16 | 40 | 0.447424374 |
| 189 | 16 | 27 | 0.447302278 |
| 190 | 30 | 38 | 0.446420502 |
| 191 | 16 | 39 | 0.446401037 |
| 192 | 25 | 26 | 0.445035837 |
| 193 | 25 | 23 | 0.444466987 |
| 194 | 30 | 27 | 0.444012965 |
| 195 | 25 | 36 | 0.443689919 |
| 196 | 30 | 4  | 0.442498894 |
| 197 | 25 | 22 | 0.442301326 |
| 198 | 30 | 31 | 0.441184503 |
| 199 | 30 | 18 | 0.439744592 |
| 200 | 25 | 42 | 0.438817696 |
| 201 | 30 | 3  | 0.437924211 |

---

---

|     |    |    |             |
|-----|----|----|-------------|
| 202 | 25 | 35 | 0.437828917 |
| 203 | 25 | 34 | 0.437688685 |
| 204 | 25 | 37 | 0.437076831 |
| 205 | 30 | 20 | 0.436962621 |
| 206 | 25 | 31 | 0.436040908 |
| 207 | 30 | 10 | 0.435822749 |
| 208 | 25 | 40 | 0.4353366   |
| 209 | 25 | 27 | 0.434892645 |
| 210 | 30 | 29 | 0.433026623 |

---

Table S6 Primers used in this study.

| Gene                 | Primer                    |
|----------------------|---------------------------|
| <i>cath1-1</i>       | F-`GGTCTTTTCGCACAATCGCTC` |
|                      | R-`TTCAAACCACTCATCGCCGT`  |
| <i>cath1-2</i>       | F-`GCTGTGTCATCCGCTCATCA`  |
|                      | R-`TTGGAGGCAAACCTCAGCGA`  |
| <i>cath1-3</i>       | F-`CCAAAACCTCCGCGAATCCA`  |
|                      | R-`AGTGGTTAGCAGGTTTGCT`   |
| <i>cath1-4</i>       | F-`GCTGTGTCATCCGCTCATCA`  |
|                      | R-`TTGGAGGCAAACCTCAGCGA`  |
| <i>cath1-5</i>       | F-`ACATACCTTGATGCCGGACC`  |
|                      | R-`ACCCAGTCTTCTCCCCATT`   |
| <i>cath1-6</i>       | F-`CTCACCAGGAGTGTTCGAT`   |
|                      | R-`CATCGGGTGGGAGTTGTGTT`  |
| <i>Gly-hydro</i>     | F-`CAACGCTGAAAAACGGGCAA`  |
|                      | R-`TCCGTAAAGGCTGCACCAAA`  |
| <i>O-Gly-hydro30</i> | F-`TAACCCCGGATCTCATCGT`   |
|                      | R-`AGCCAGCCGGATCTTTGATT`  |
| <i>asp</i>           | F-`CCTGCGATGTGGACTGCTTA`  |
|                      | R-`GCGGCTGATGTAAGTGTTCG`  |
| <i>elo-6</i>         | F-`GCTGTTTTTCAGTATCGGCGG` |
|                      | R-`GCGGAGAACCAGGAAAATGG`  |
| <i>ALDH2</i>         | F-`AATATCGTGGCCCCTGAACC`  |
|                      | R-`GCATCCTTTCAGCCTTGAC`   |
| <i>Cbn-sodh-2</i>    | F-`TGGTTTTGGTGTTCATTGCCG` |
|                      | R-`TCGTCCAGCGTCTCATTAG`   |
| <i>acetyl-CoA</i>    | F-`TCGCCAAAAGGTGGGCTAT`   |
|                      | R-`ATGGCGGGGATGTTGATGTT`  |
| <i>acsf2</i>         | F-`GGAAAGTGGGAGTGTTCAGCA` |

---

|               |                           |
|---------------|---------------------------|
|               | R-`GATGTTTGAGGTCGGGGAGG`  |
| <i>fae5</i>   | F-`AGTCGAGACCGAACCTTC`    |
|               | R-`TCTGATCCAAGTGGGGGTTG`  |
| <i>mec-12</i> | F-`TTGAGCCCTACAACCTCCGTG` |
|               | R-`AAGCGGTAATGGAGCTGACC`  |

---

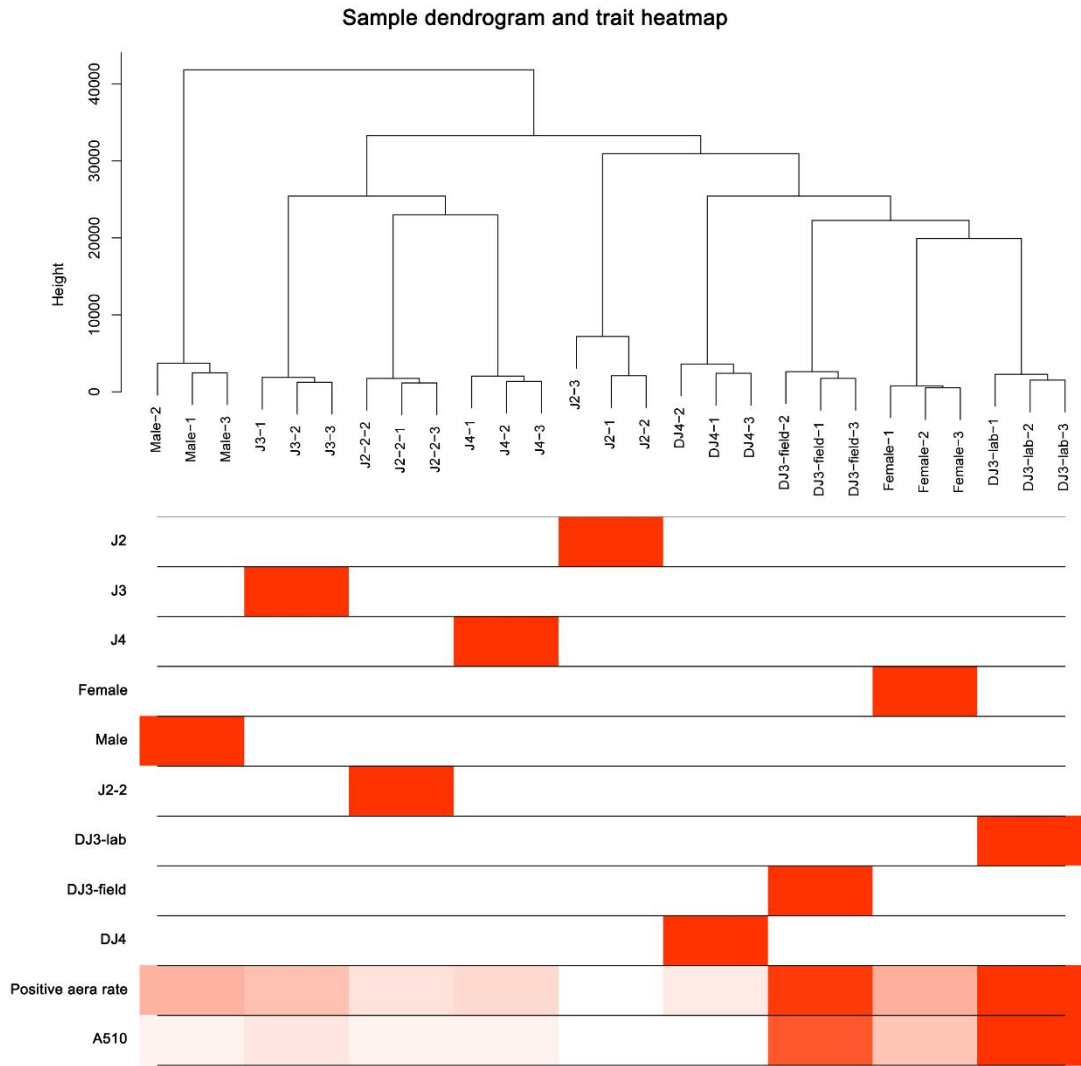

Figure S1. Clustering dendrogram of samples based on their Euclidean distance

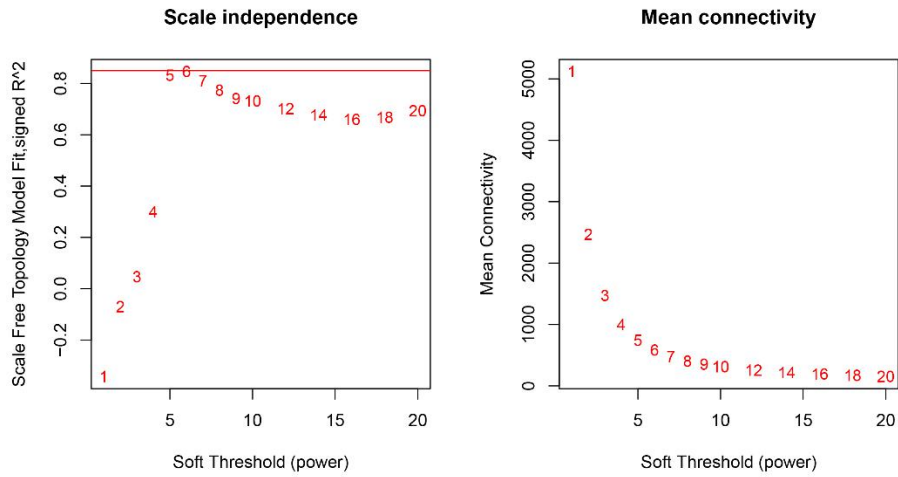

Figure S2. Analysis of network topology with various soft-thresholding powers. The left panel shows the scale-free fit index (y-axis) as a function of the soft-thresholding power (x-axis). The right panel displays the mean connectivity (degree, y-axis) as a function of the soft-thresholding power (x-axis). The red line indicates scale-free fit index is equal to 0.85.



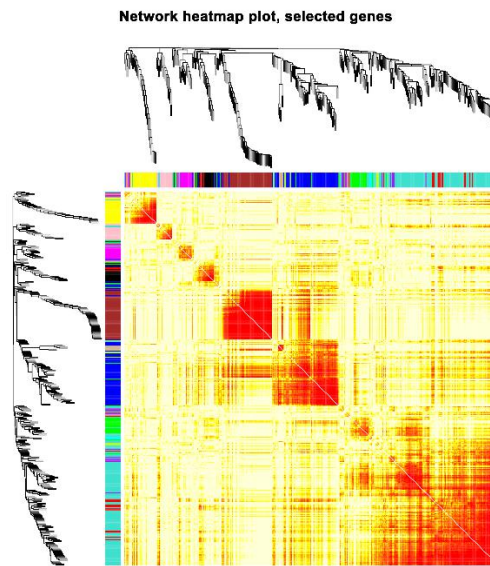

Figure S3. Visualization of the gene network using a heatmap plot. The heatmap depicts the Topological Overlap Matrix (TOM) among 400 genes in the analysis. Light color represents low overlap and progressively darker red color represents higher overlap. Blocks of darker colors along the diagonal are the modules. The gene dendrogram and module assignment are also shown along the left side and the top.

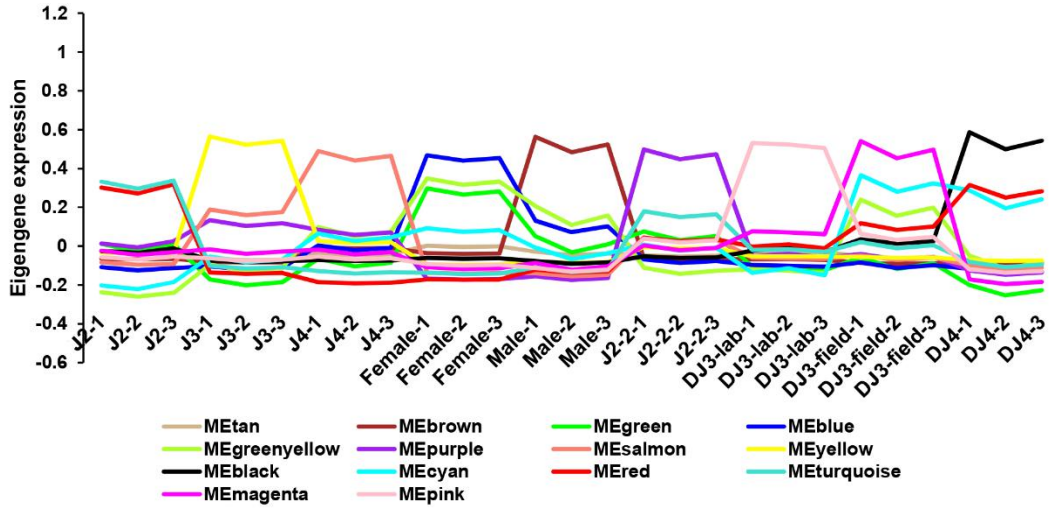

Figure S4 Module eigengene expression profile.

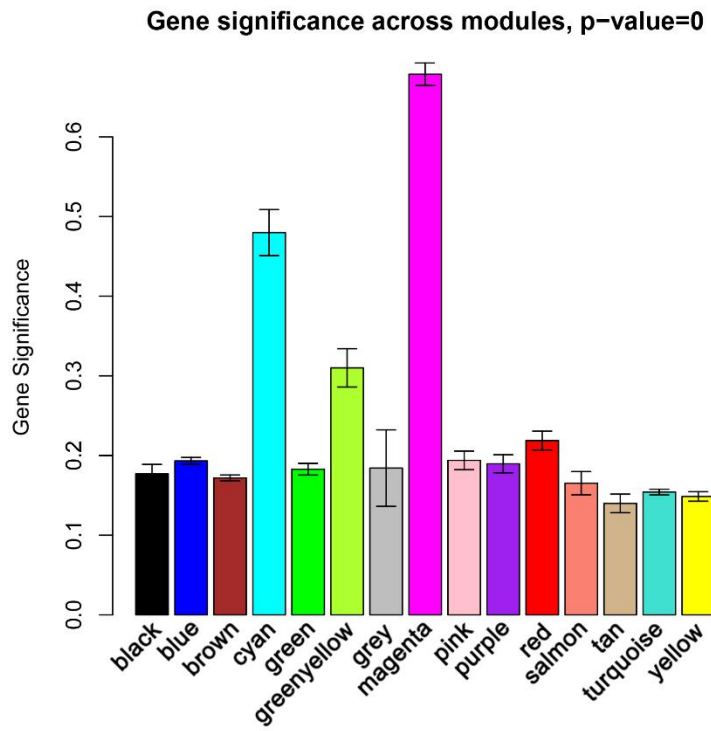

Figure S5. Bar plot of module significance defined as the mean gene significance across all genes in the module to the DJ3-lab trait. The magenta module is the most promising.

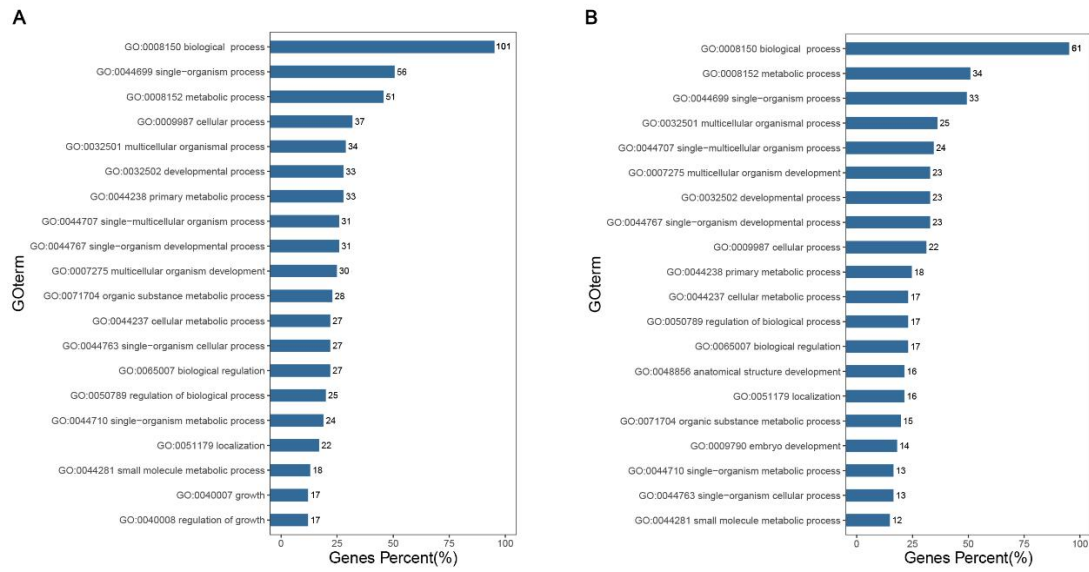

Figure S6. GO enrichment analysis (Biology Process) of the genes in the pink and magenta modules. **A:** Module pink. **B:** Module magenta.

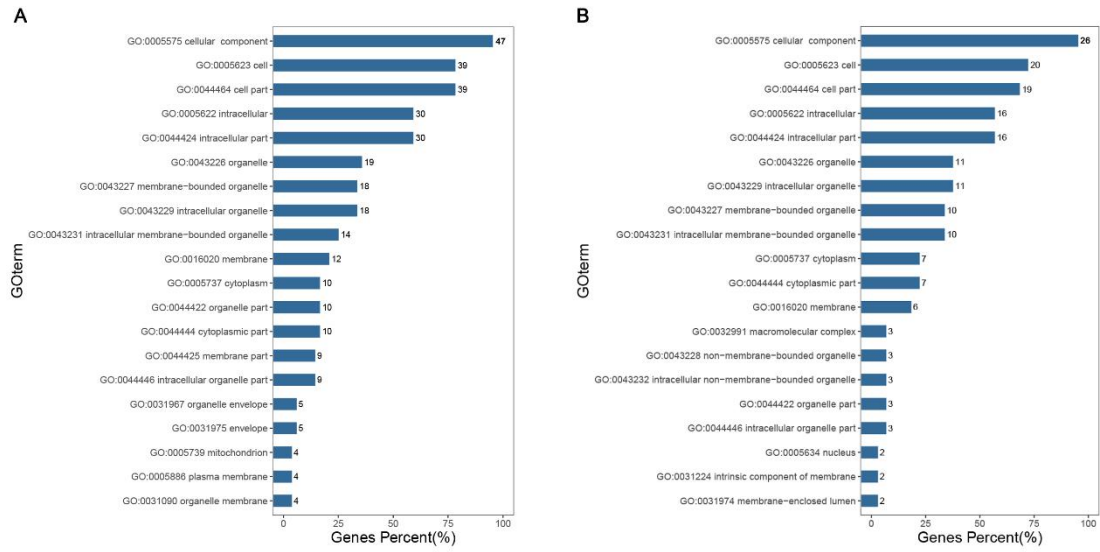

Figure S7. GO enrichment analysis (Cellular Component) of the genes in the pink and magenta modules. **A:** Module pink. **B:** Module magenta.

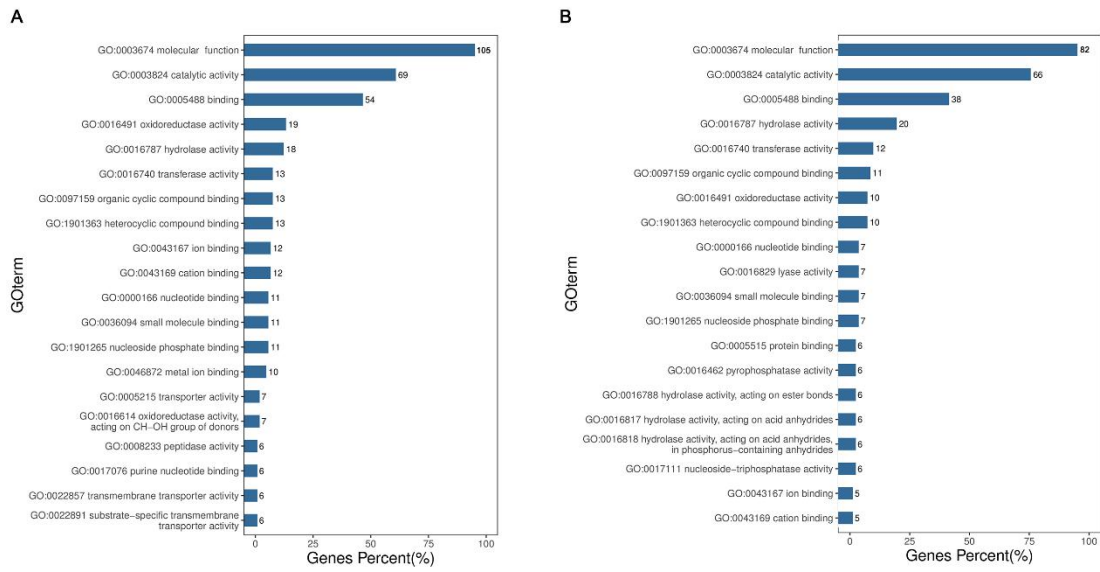

Figure S8. GO enrichment analysis (Molecular Function) of the genes in the pink and magenta modules. **A:** Module pink. **B:** Module magenta.

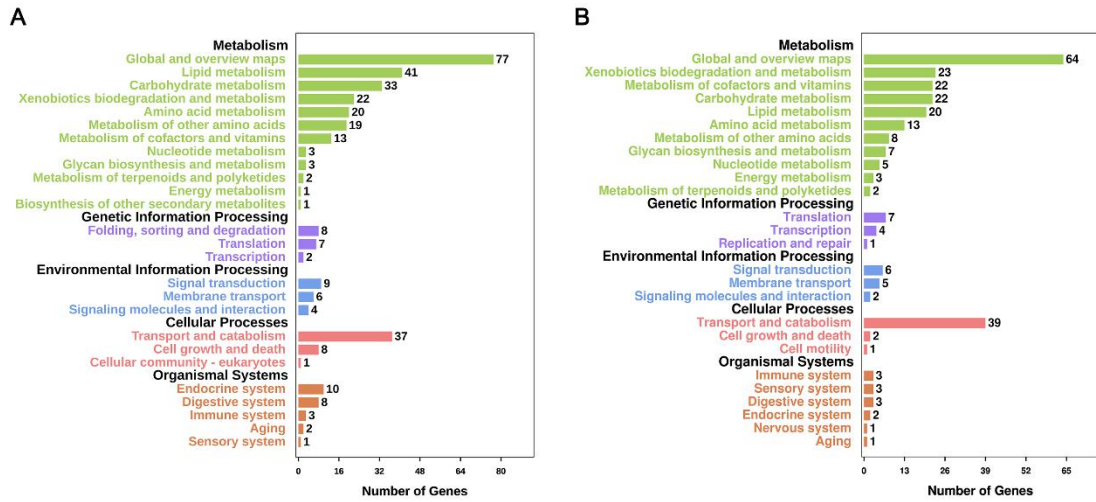

Figure S9. KEGG enrichment analysis of the genes in the pink and magenta modules. **A:** Module pink. **B:** Module magenta.

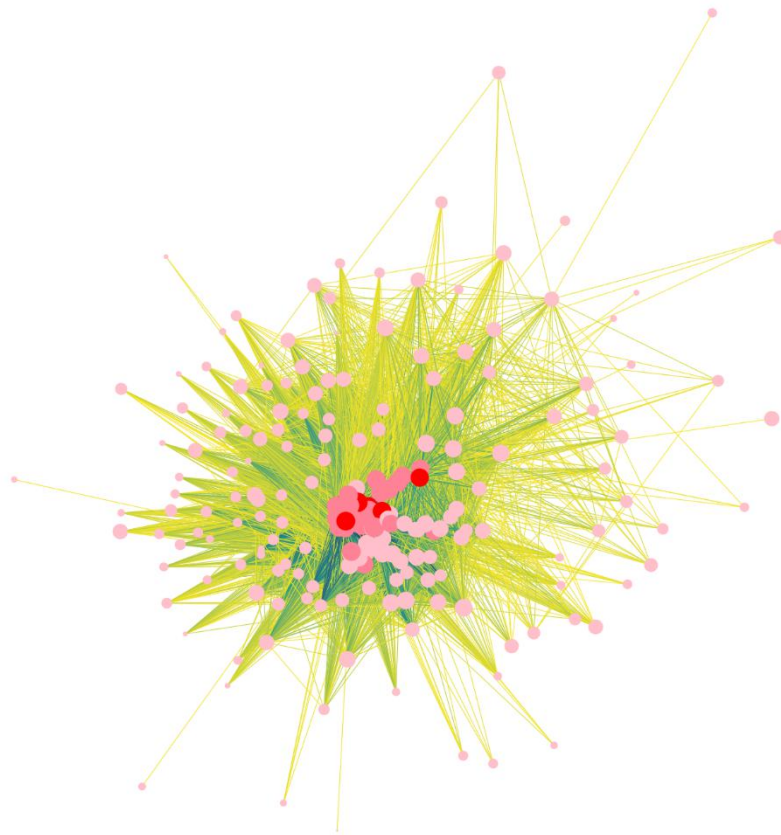

Figure S10. Visualization of pink module (weight value $>0.3$ ). Prefuse Force Directed Layout was applied based on weight value. Size of the dots represents IC (from 17.3445 to 159.5326). Deep pink highlights the top 30 hub genes. Red highlights 6 hub genes in the pink module with extremely high homology to cysteine protease family cathepsin 1.
